# Supplementary material for: Effect of body size on the oral pharmacokinetics of oxytetracycline in rainbow trout (Oncorhynchus mykiss)
Source: PeerJ. 2024 Sep 11;12:e17973. doi: 10.7717/peerj.17973 (PMC11401510; doi:10.7717/peerj.17973)
Supplement: Data S1 [file peerj-12-17973-s002.xlsx]

## Sheet: Sayfa1
		Tablo 2. Plasma concentrations after oral administration of oxytetracycline at a dose of 60 mg/kg to rainbow trout of different sizes (n=6, µg/mL).
		Time (hour)	Small body size	Medium body size	Large body size
		0.25	0.18±0.03	0.25±0.03	0.28±0.06
		0.5	0.26±0.03	0.32±0.04	0.38±0.07
		1	0.35±0.03	0.42±0.06	0.52±0.10
		2	0.42±0.04	0.52±0.07	0.64±0.10
		4	0.50±0.04	0.61±0.09	0.80±0.11
		8	0.60±0.06	0.73±0.11	0.94±0.13
		12	0.66±0.07	0.87±0.12	1.11±0.12
		24	0.58±0.05	0.73±0.09	0.98±0.12
		48	0.50±0.04	0.62±0.08	0.85±0.11
		72	0.41±0.02	0.53±0.08	0.73±0.11
		96	0.35±0.03	0.44±0.07	0.61±0.10
		120	0.29±0.03	0.37±0.06	0.48±0.08
		144	0.23±0.02	0.30±0.03	0.38±0.07
		192	0.15±0.01	0.20±0.04	0.26±0.04
		240	0.10±0.01	0.14±0.02	0.18±0.03
		288	0.07±0.01	0.09±0.01	0.12±0.02
		336	0.05±0.01	0.06±0.00	0.09±0.01
		384	ND	0.04±0.00	0.06±0.01
		ND: not detected.
