# Supplementary material for: Effect of body size on the oral pharmacokinetics of oxytetracycline in rainbow trout (Oncorhynchus mykiss)
Source: PeerJ. 2024 Sep 11;12:e17973. doi: 10.7717/peerj.17973 (PMC11401510; doi:10.7717/peerj.17973)
Supplement: Supplemental Information 3 [file peerj-12-17973-s003.xlsx]

## Sheet: concentration
Effect of body size on the oral pharmacokinetics of oxytetracycline in rainbow trout (Oncorhynchus mykiss)
Small body size
1 hy	2 hy	3 hy	4 hy	5 hy	6 hy	time	conc	std
0.190894	0.129014	0.172449	0.231144	0.198489	0.180079	0.25	0.183678	0.0336204
0.250534	0.213259	0.249169	0.306849	0.275489	0.260054	0.5	0.259226	0.0310573
0.337789	0.318259	0.310699	0.394489	0.355989	0.356374	1	0.3456	0.0304656
0.405969	0.385564	0.377199	0.469214	0.443489	0.427389	2	0.418137	0.0352765
0.478559	0.454759	0.449299	0.551779	0.548489	0.503269	4	0.497692	0.0449178
0.583734	0.522764	0.563749	0.679039	0.667489	0.600901	8	0.602946	0.0604893
0.714949	0.609949	0.635989	0.758489	0.583489	0.684219	12	0.664514	0.0665122
0.586289	0.541489	0.561789	0.656779	0.527489	0.599134	24	0.578828	0.0466145
0.485909	0.462704	0.482479	0.564834	0.474989	0.513769	48	0.497447	0.0370837
0.431344	0.377059	0.404814	0.444994	0.418989	0.411026	72	0.414704	0.0234146
0.355289	0.305169	0.349024	0.382519	0.366489	0.343844	96	0.350389	0.0260964
0.285989	0.238004	0.293409	0.313429	0.303489	0.275716	120	0.285006	0.02652
0.236569	0.192504	0.237829	0.256589	0.247489	0.224547	144	0.232588	0.0224178
0.149135	0.127645	0.150815	0.16856	0.154	0.148102	192	0.14971	0.0131509
0.10962	0.08029	0.107205	0.114905	0.098	0.0975975	240	0.10127	0.0122898
0.072205	0.05936	0.07581	0.07742	0.0665	0.06839	288	0.0699475	0.00665897
0.04375	0.040075	0.049	0.0525	0.042	0.0462875	336	0.0456021	0.00461629
		#REF!
Medium body size
1 hy	2 hy	3 hy	4 hy	5 hy	6 hy	time	conc	std
0.238564	0.210109	0.245704	0.293269	0.268489	0.224739	0.25	0.246812	0.0301056
0.310384	0.281334	0.310629	0.404814	0.320989	0.294739	0.5	0.320482	0.0436038
0.410309	0.347869	0.442544	0.507679	0.425989	0.373489	1	0.41798	0.0559773
0.510514	0.428089	0.523359	0.630984	0.485489	0.534489	2	0.518821	0.0667217
0.564659	0.487204	0.633014	0.742634	0.576489	0.670989	4	0.612498	0.0895112
0.659089	0.587339	0.758664	0.869509	0.688489	0.828489	8	0.73193	0.106832
0.792649	0.721284	0.875529	0.999044	0.793489	1.02449	12	0.867747	0.122043
0.664129	0.639664	0.777249	0.867269	0.674489	0.753466	24	0.729378	0.0862608
0.561579	0.523429	0.635989	0.759154	0.593989	0.641291	48	0.619239	0.081835
0.480764	0.432814	0.545094	0.657129	0.513489	0.544971	72	0.529044	0.075829
0.409329	0.361064	0.443839	0.558254	0.425989	0.459659	96	0.443022	0.0658761
0.334289	0.301669	0.369219	0.474324	0.359489	0.387996	120	0.371164	0.0587447
0.267754	0.259914	0.301214	0.351859	0.310629	0.305886	144	0.299543	0.0331176
0.157255	0.16632	0.201775	0.25515	0.2275	0.210735	192	0.203122	0.03693
0.10801	0.11529	0.142555	0.167615	0.154	0.141452	240	0.138154	0.0227188
0.080185	0.08708	0.09569	0.106295	0.1015	0.0966875	288	0.0945729	0.00953171
0.05789	0.06125	0.063	0.07	0.06825	0.065625	336	0.0643358	0.00451489
0.04025	0.0434	0.04375	0.04655	0.042	0.044975	384	0.0434875	0.00220736
Large body size
1 hy	2 hy	3 hy	4 hy	5 hy	6 hy	time	conc	std
0.267929	0.368834	0.297049	0.199399	0.240489	0.284116	0.25	0.276303	0.0571322
0.351509	0.491019	0.408489	0.289489	0.345489	0.390254	0.5	0.379375	0.0684611
0.508764	0.683239	0.547894	0.378704	0.443489	0.530971	1	0.51551	0.103314
0.671479	0.795694	0.678059	0.490529	0.562489	0.643111	2	0.640227	0.104918
0.801679	0.982244	0.794854	0.652684	0.723489	0.817464	4	0.795402	0.110432
0.913049	1.15619	0.986864	0.774379	0.863489	0.965286	8	0.94321	0.129247
1.09148	1.29553	1.17849	0.966914	1.00349	1.13122	12	1.11119	0.119762
0.938284	1.18342	1.0059	0.832059	0.898489	1.00774	24	0.97765	0.12088
0.803289	1.03978	0.870314	0.723104	0.810989	0.881444	48	0.854821	0.106852
0.674699	0.916444	0.755899	0.584224	0.674489	0.750334	72	0.726015	0.112375
0.545514	0.791179	0.616144	0.498124	0.565989	0.644651	96	0.610267	0.102641
0.419864	0.620239	0.480624	0.409609	0.460989	0.514924	120	0.484375	0.0770777
0.334005	0.500955	0.38094	0.31843	0.3325	0.409692	144	0.37942	0.0688088
0.244825	0.330225	0.264145	0.21868	0.252	0.274452	192	0.264055	0.0375782
0.15694	0.228235	0.187985	0.150255	0.175	0.189245	240	0.181277	0.0279557
0.10556	0.14721	0.128975	0.106435	0.1155	0.126823	288	0.12175	0.0158863
0.077175	0.10696	0.08687	0.07	0.084	0.08848	336	0.0855808	0.0125144
0.0553	0.07	0.056	0.05145	0.06125	0.060725	384	0.0591208	0.00645977

## Sheet: PK data
		Small body size						Medium body size						Large body size
			Rsq		0.9974				Rsq		0.9994				Rsq		0.9991
			Rsq_adjusted		0.9971				Rsq_adjusted		0.9994				Rsq_adjusted		0.999
			Corr_XY		-0.9987				Corr_XY		-0.9997				Corr_XY		-0.9995
			No_points_lambda_z		12				No_points_lambda_z		12				No_points_lambda_z		12
			Lambda_z	1/hr	0.0081				Lambda_z	1/hr	0.0079				Lambda_z	1/hr	0.008
			Lambda_z_lower	hr	8				Lambda_z_lower	hr	12				Lambda_z_lower	hr	12
			Lambda_z_upper	hr	336				Lambda_z_upper	hr	384				Lambda_z_upper	hr	384
			HL_Lambda_z	hr	85.4597				HL_Lambda_z	hr	87.2386				HL_Lambda_z	hr	86.9833
			Tlag	hr	0				Tlag	hr	0				Tlag	hr	0
			Tmax	hr	12				Tmax	hr	12				Tmax	hr	12
			Cmax	ug/mL	0.6645				Cmax	ug/mL	0.8677				Cmax	ug/mL	1.1112
			Tlast	hr	336				Tlast	hr	384				Tlast	hr	384
			Clast	ug/mL	0.0456				Clast	ug/mL	0.0435				Clast	ug/mL	0.0591
			AUClast	hr*ug/mL	82.2372				AUClast	hr*ug/mL	108.476				AUClast	hr*ug/mL	144.105
			AUCall	hr*ug/mL	82.2372				AUCall	hr*ug/mL	108.476				AUCall	hr*ug/mL	144.105
			AUCINF_obs	hr*ug/mL	87.8596				AUCINF_obs	hr*ug/mL	113.949				AUCINF_obs	hr*ug/mL	151.524
			AUCINF_D_obs	hr*kg*ug/mL/mg	1.4643				AUCINF_D_obs	hr*kg*ug/mL/mg	1.8991				AUCINF_D_obs	hr*kg*ug/mL/mg	2.5254
			AUC_%Extrap_obs	%	6.3993	L/kg			AUC_%Extrap_obs	%	4.8033	L/kg			AUC_%Extrap_obs	%	4.8963	L/kg
			Vz_F_obs	mL/kg	84197.3	84.1973			Vz_F_obs	mL/kg	66271.2	66.2712			Vz_F_obs	mL/kg	49691.4	49.6914
			Cl_F_obs	mL/hr/kg	682.908	0.682908			Cl_F_obs	mL/hr/kg	526.552	0.526552			Cl_F_obs	mL/hr/kg	395.978	0.395978
			AUCINF_pred	hr*ug/mL	88.0631				AUCINF_pred	hr*ug/mL	114.021				AUCINF_pred	hr*ug/mL	151.396
			AUCINF_D_pred	hr*kg*ug/mL/mg	1.4677				AUCINF_D_pred	hr*kg*ug/mL/mg	1.9004				AUCINF_D_pred	hr*kg*ug/mL/mg	2.5233
			AUC_%Extrap_pred	%	6.6157				AUC_%Extrap_pred	%	4.8636				AUC_%Extrap_pred	%	4.816
			Vz_F_pred	mL/kg	84002.6				Vz_F_pred	mL/kg	66229.2				Vz_F_pred	mL/kg	49733.4
			Cl_F_pred	mL/hr/kg	681.329				Cl_F_pred	mL/hr/kg	526.218				Cl_F_pred	mL/hr/kg	396.312
			AUMClast	hr*hr*ug/mL	8376.06				AUMClast	hr*hr*ug/mL	11950.4				AUMClast	hr*hr*ug/mL	15762
			AUMCINF_obs	hr*hr*ug/mL	10958.4				AUMCINF_obs	hr*hr*ug/mL	14741				AUMCINF_obs	hr*hr*ug/mL	19542
			AUMC_%Extrap_obs	%	23.5648				AUMC_%Extrap_obs	%	18.9309				AUMC_%Extrap_obs	%	19.3428
			AUMCINF_pred	hr*hr*ug/mL	11051.9				AUMCINF_pred	hr*hr*ug/mL	14777.8				AUMCINF_pred	hr*hr*ug/mL	19476.8
			AUMC_%Extrap_pred	%	24.2114				AUMC_%Extrap_pred	%	19.133				AUMC_%Extrap_pred	%	19.0729
			MRTlast	hr	101.852				MRTlast	hr	110.166				MRTlast	hr	109.379
			MRTINF_obs	hr	124.726				MRTINF_obs	hr	129.365				MRTINF_obs	hr	128.97
			MRTINF_pred	hr	125.499				MRTINF_pred	hr	129.606				MRTINF_pred	hr	128.648
